# Supplementary material for: Novel Neutralizing Epitope of PEDV S1 Protein Identified by IgM Monoclonal Antibody
Source: MDPI journal article supplement (doi:10.3390/v14010125), 2022-01-11
Supplement: s1 [file s1]

Supplementary materials

# Novel Neutralizing Epitope of PEDV S1 Protein Identified by IgM Monoclonal Antibody

**Table S1.** Oligonucleotide primers used in this study for production of recombinant S1 subunit of PEDV spike protein.

| Genes | Primer     | Sequence                                          |
|-------|------------|---------------------------------------------------|
| S1    | PEDV_S1 F' | 5'-GCGGATCCGATGAARTCYTTAAMYTACTTCTGG-3'           |
|       | PEDV_S1 R' | 5'-GGGCTCGAGTGAACCGCCTCCACCRTGGTARAAGAAAC-CAGG-3' |

**Table S2.** PEDV that caused recent outbreaks and their S1 sequences were used in this study for multiple alignments.

| No. | Isolate name        | Isolated year | Country     | Genotype | References |
|-----|---------------------|---------------|-------------|----------|------------|
| 1   | JX-SCAU2020         | 2020          | China       | -        | [44]       |
| 2   | CN/Liaoning/25/2018 | 2019          | China       | -        | [60]       |
| 3   | POR-VC102           | 2019          | Portugal    | G1b      | [61]       |
| 4   | SF4017              | 2017          | Philippines | G2       | [62]       |
| 5   | SP-VC3              | 2017          | Spain       | G1b      | [61]       |
| 6   | HNAY2016            | 2016          | China       | -        | [63]       |

-, not available.

**Table S3.** Other alphacoronaviruses that their S1 sequences were used in this study for multiple alignments .

| Virus name                                  | Isolate name   | Isolated year | Country                  | GenBank no. |
|---------------------------------------------|----------------|---------------|--------------------------|-------------|
| Transmissible gastro-enteritis virus (TGEV) | Purdue P115    | 2006          | United states of America | ABG89325.1  |
| Feline coronavirus (FCoV)                   | WSU 79/1683    | 2011          | United states of America | JN634064.1  |
| Canine coronavirus (CCoV)                   | DOG/HCM47/2015 | 2015          | Vietnam                  | LC190907.1  |
